# Supplementary material for: Impact of Virtual Reality on Pain and Anxiety During Intravenous Cannulation Procedures Among Thalassemia Patients in the UAE: A Crossover Clinical Trial
Source: Research Square preprint supplement (doi:10.21203/rs.3.rs-7539274/v1), 2025-09-23
Supplement: Supplementary file 1 [file a5910a334cebae91b389892c.pdf]

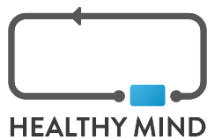

## Patient Questionnaire

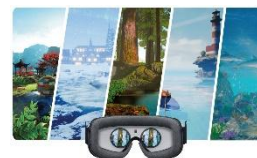

Hospital/Establishment: Dubai Thalassemia Center

Date: \_\_\_\_\_

Age of the patient: \_\_\_\_\_

Participant Number: \_\_\_\_\_

Current Visit Number: ☐ 1

☐ 2

☐ 3

On a scale from 0 to 10, how would you rate your anxiety?

Without VR (SOC): (no anxiety)

0 1 2 3 4 5 6 7 8 9 10

(worst anxiety)

With VR (this session): (no anxiety)

0 1 2 3 4 5 6 7 8 9 10

(worst anxiety)

On a scale from 0 to 10, how would you rate your pain?

Without VR (SOC): (no pain)

0 1 2 3 4 5 6 7 8 9 10

(worst pain)

With VR (this session): (no pain)

0 1 2 3 4 5 6 7 8 9 10

(worst pain)

On a scale from 0 to 10, how would you rate your fatigue?

Without VR (SOC): (no fatigue)

0 1 2 3 4 5 6 7 8 9 10

(worst fatigue)

With VR (this session): (no fatigue)

0 1 2 3 4 5 6 7 8 9 10

(worst fatigue)

On a scale from 0 to 10, how would you rate your boredom?

Without VR (SOC): (no boredom)

0 1 2 3 4 5 6 7 8 9 10

(worst boredom)

With VR (this session): (no boredom)

0 1 2 3 4 5 6 7 8 9 10

(worst boredom)

Recorded Heart Rate: \_\_\_\_\_bpm

Recorded Blood Pressure: \_\_\_\_\_mm/Hg

### Patient Satisfaction

| Evaluation criteria  | Score                                                                                                 |                                                                                                  |                                                                                               |                                                                                                 |                                                                                                      |
|----------------------|-------------------------------------------------------------------------------------------------------|--------------------------------------------------------------------------------------------------|-----------------------------------------------------------------------------------------------|-------------------------------------------------------------------------------------------------|------------------------------------------------------------------------------------------------------|
| YOUR EXPERIENCE      |  Very dissatisfied |  Dissatisfied |  Neutral |  Satisfied |  Very satisfied |
| Overall Satisfaction |                                                                                                       |                                                                                                  |                                                                                               |                                                                                                 |                                                                                                      |
| Device Comfort       |                                                                                                       |                                                                                                  |                                                                                               |                                                                                                 |                                                                                                      |
| Overall Safety       |                                                                                                       |                                                                                                  |                                                                                               |                                                                                                 |                                                                                                      |
| Proposed Environment |                                                                                                       |                                                                                                  |                                                                                               |                                                                                                 |                                                                                                      |

|                                                                    |                                                                                                     |                                                                                            |                                                                                             |                                                                                           |                                                                                                    |
|--------------------------------------------------------------------|-----------------------------------------------------------------------------------------------------|--------------------------------------------------------------------------------------------|---------------------------------------------------------------------------------------------|-------------------------------------------------------------------------------------------|----------------------------------------------------------------------------------------------------|
| Cardiac Coherence/Breathing Exercise                               |                                                                                                     |                                                                                            |                                                                                             |                                                                                           |                                                                                                    |
| Feeling of Relaxation                                              |                                                                                                     |                                                                                            |                                                                                             |                                                                                           |                                                                                                    |
| RECOMMENDATION                                                     |  Strongly disagree |  Disagree |  Neutral |  Agree |  Strongly agree |
| In this medical context, would you like to repeat this experience? |                                                                                                     |                                                                                            |                                                                                             |                                                                                           |                                                                                                    |
| Would you recommend this experience to other patients?             |                                                                                                     |                                                                                            |                                                                                             |                                                                                           |                                                                                                    |
| ADDITIONAL COMMENTS:                                               |                                                                                                     |                                                                                            |                                                                                             |                                                                                           |                                                                                                    |
|                                                                    |                                                                                                     |                                                                                            |                                                                                             |                                                                                           |                                                                                                    |
